# Supplementary material for: Tracking cytosine depletion in SARS-CoV-2
Source: bioRxiv or medRxiv preprint supplement (doi:10.1101/2020.10.26.354787), 2020-10-26
Supplement: Supplementary file [file media-1.pdf]

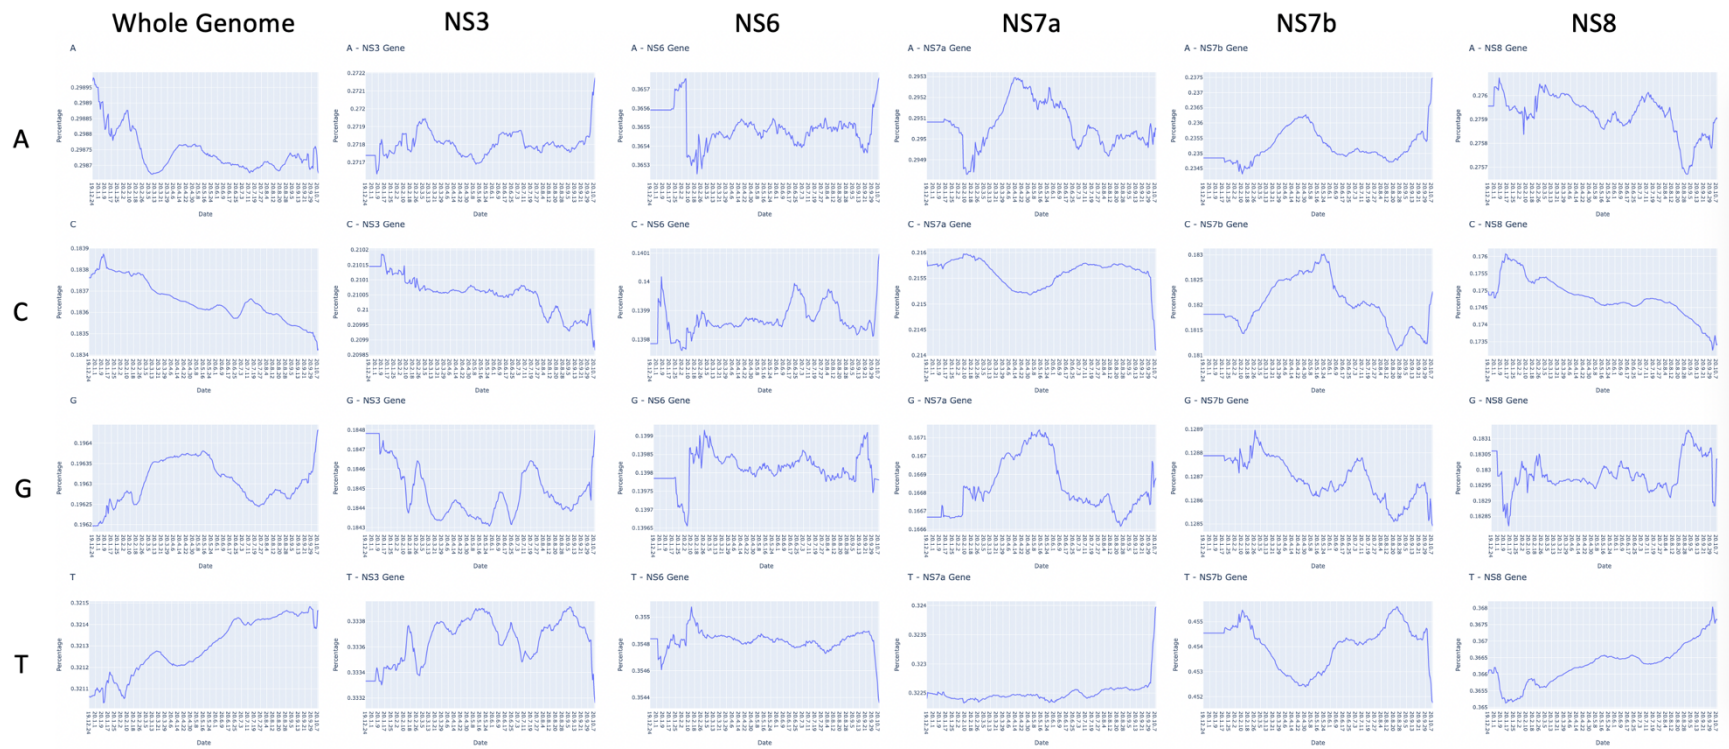

**Supplementary Figure 1:** The trend of mononucleotide A, C, G and T in 137,315 SARS-CoV-2 strains collected from Dec 20, 2019 to Oct 2, 2020. The data points were smoothed by a 15-day window.
